# Supplementary material for: Inhibition of DYRK1A disrupts neural lineage specificationin human pluripotent stem cells
Source: eLife journal article supplement (doi:10.7554/elife.24502), 2017-09-04
Supplement: supp [file elife-24502-supp-v1.zip]

Figure 2, figure supplement 1

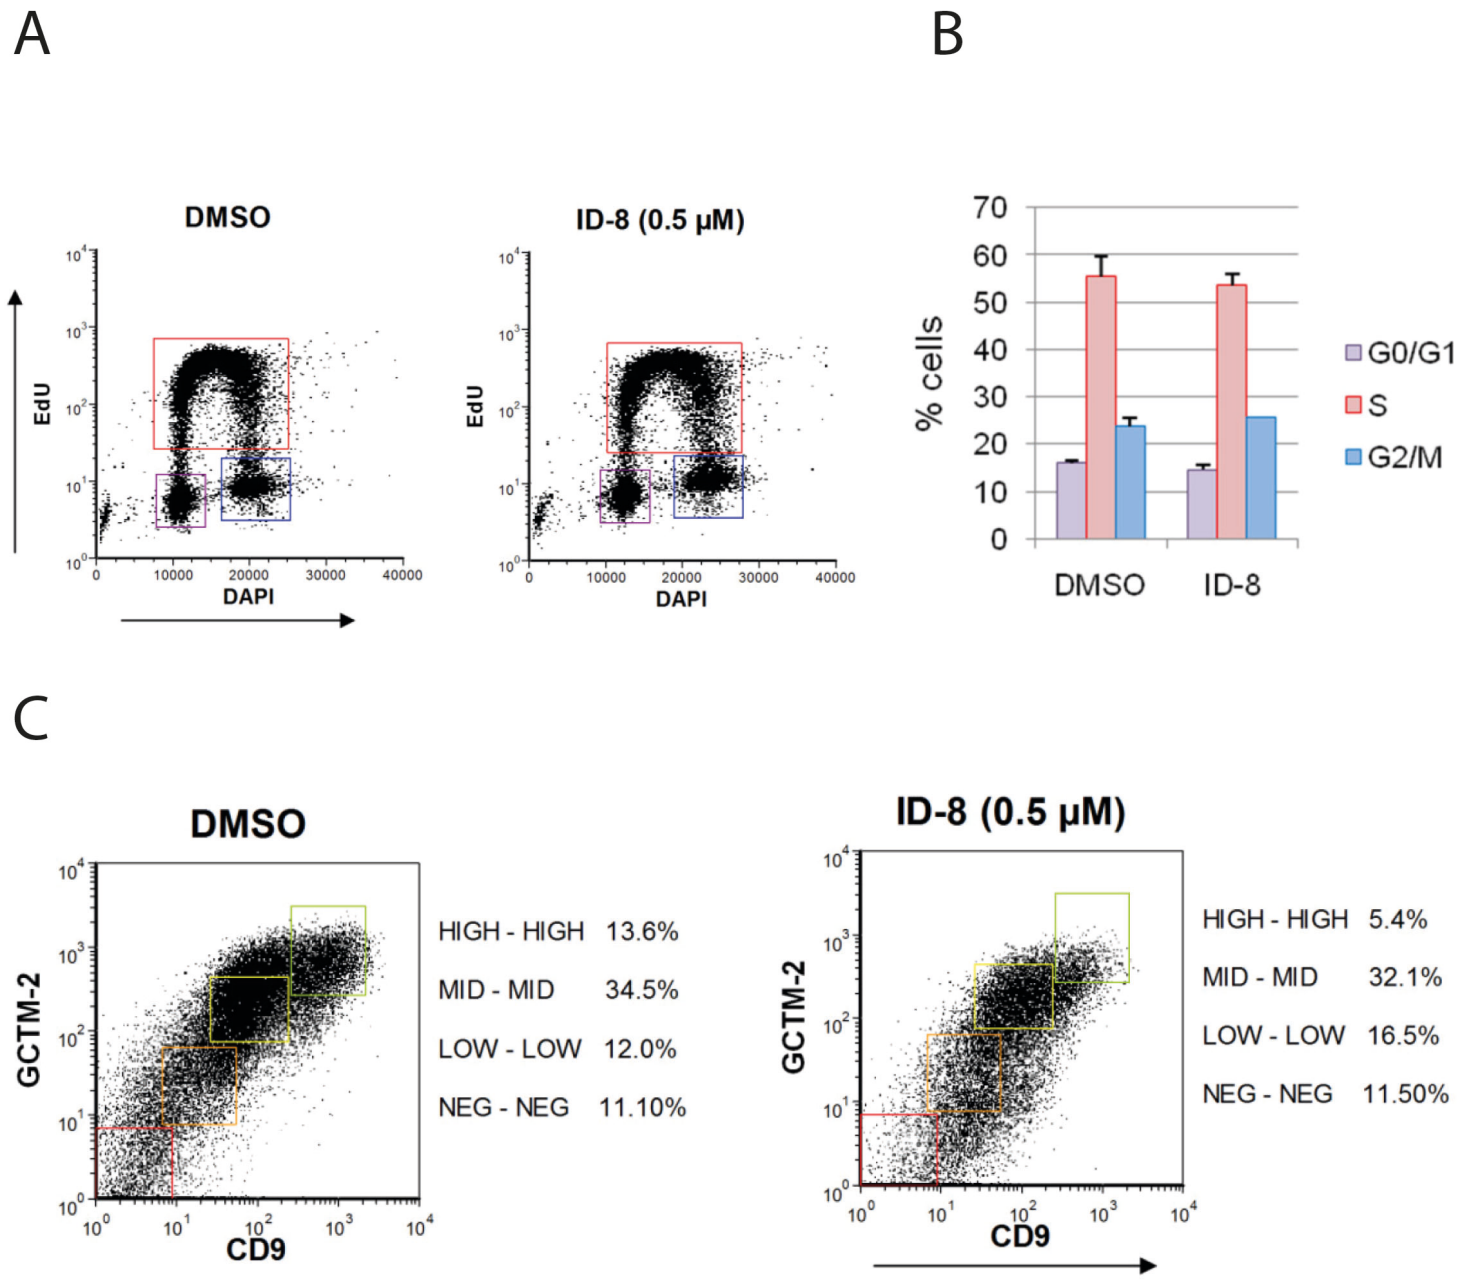

Figure 2 figure supplement 1. ID-8 treatment does not interfere with hESC proliferation or alter expression of stem cell markers under conditions that promote self-renewal. A, flow cytometry profiles of control and ID-8 treated cells following incubation with a pulse of Edu; B, proportion of cells in G0/G1, S, and G2/M phases in control or ID-8 treated cultures; C, ID-8 treatment does not alter proportion of cells bearing hESC stem cell surface markers. Dual label flow cytometry profiles for stem cell antigens GCTM-2 and CD9 in control and ID-8 treated cells.
