# Supplementary material for: Inhibition of DYRK1A disrupts neural lineage specificationin human pluripotent stem cells
Source: eLife journal article supplement (doi:10.7554/elife.24502), 2017-09-04
Supplement: supp [file elife-24502-supp-v1.zip]

Archive with 9 entries (9 files):
- elife_poa_e24502_Supplementary_File_2.docx
- elife_poa_e24502_Supplementary_File_3.docx
- elife_poa_e24502_Transparent_Reporting_Form.pdf
- elife_poa_e24502_Figure_2_Figure_Supplement_2.pdf
- elife_poa_e24502_Figure_5_Figure_Supplement_1.pdf
- elife_poa_e24502_Figure_4_figure_supplement_1.pdf
- elife_poa_e24502_Figure_2_Figure_Supplement_1.pdf
- elife_poa_e24502_Figure_1_Figure_Supplement_1.pdf
- elife_poa_e24502_Supplementary_File_1.xlsx
