# Supplementary material for: Inhibition of DYRK1A disrupts neural lineage specificationin human pluripotent stem cells
Source: eLife journal article supplement (doi:10.7554/elife.24502), 2017-09-04
Supplement: supp [file elife-24502-supp-v1.zip]

Figure 2, figure supplement 2

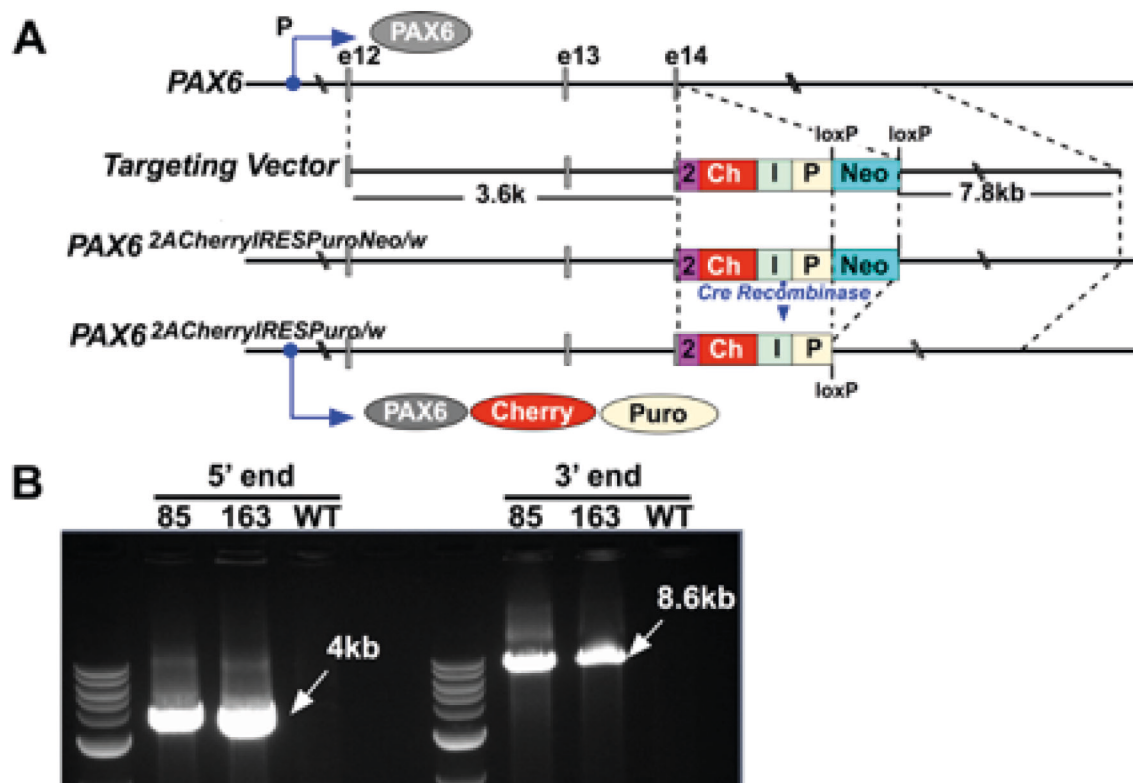

Figure 2 figure supplement 2. Targeting of the *PAX6* gene with an mCherry-Ires-Puro reporter cassette. A. Structure of the *PAX6* targeting vector. The upper line shows the endogenous *PAX6* gene with exons (and exon number, e12, e13, e14) indicated by grey boxes. The second line shows the targeting vector with its constituent components, from left to right, the 5' homology arm, a T2A sequence (2), mCherry (Ch), IRES (I), puromycin resistance gene (P), a loxP flanked PGKNeo cassette (Neo) and the 3' homology arm. The third line shows the structure of the modified *PAX6* locus following integration of the targeting vector. The fourth line shows the modified *PAX6* locus following cre-recombinase mediated removal of the PGKNeo selection cassette. The protein products predicted to be translated from this locus, PAX6, mCherry and Puromycin resistance, are shown underneath. B. PCR analysis confirming correct integration of the targeting vector in two independent clones (85, 163). Note these PCR products of the correct size were not generated when wild type (wt) was used as a template
