# Supplementary material for: Inhibition of DYRK1A disrupts neural lineage specificationin human pluripotent stem cells
Source: eLife journal article supplement (doi:10.7554/elife.24502), 2017-09-04
Supplement: supp [file elife-24502-supp-v1.zip › elife_poa_e24502_Figure_1_Figure_Supplement_1.pdf]

# Figure 1, figure supplement 1

## Preparation of ID-8 and C-ring isomers:

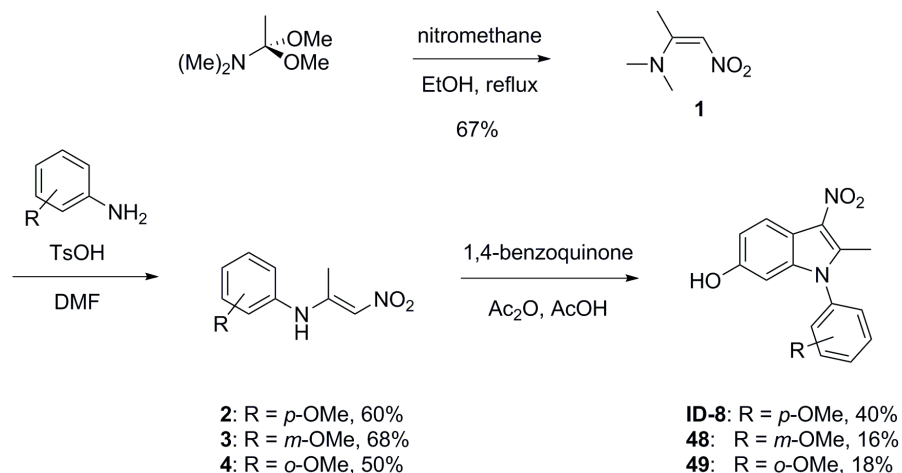

## Preparation of 1,3 and 6-position modified variants of ID-8:

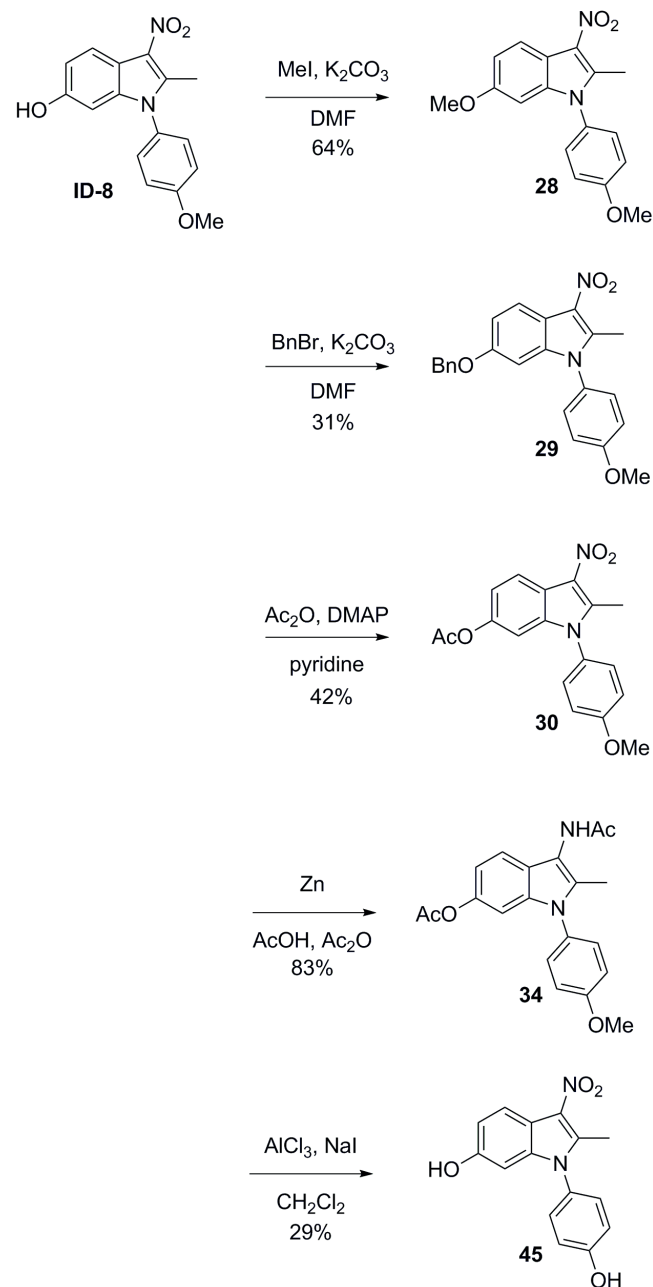

## Preparation of 6-deoxy variant of ID-8:

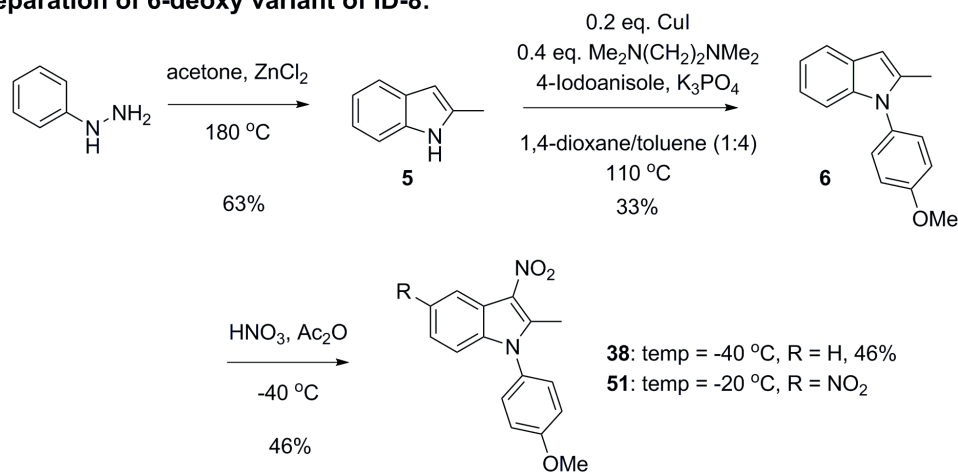

Figure 1 figure supplement 1. Schematic illustration of chemical syntheses of ID-8 analogues.
