# Supplementary material for: Inhibition of DYRK1A disrupts neural lineage specificationin human pluripotent stem cells
Source: eLife journal article supplement (doi:10.7554/elife.24502), 2017-09-04
Supplement: supp [file elife-24502-supp-v1.zip › elife_poa_e24502_Figure_5_Figure_Supplement_1.pdf]

Figure 5, figure supplement 1

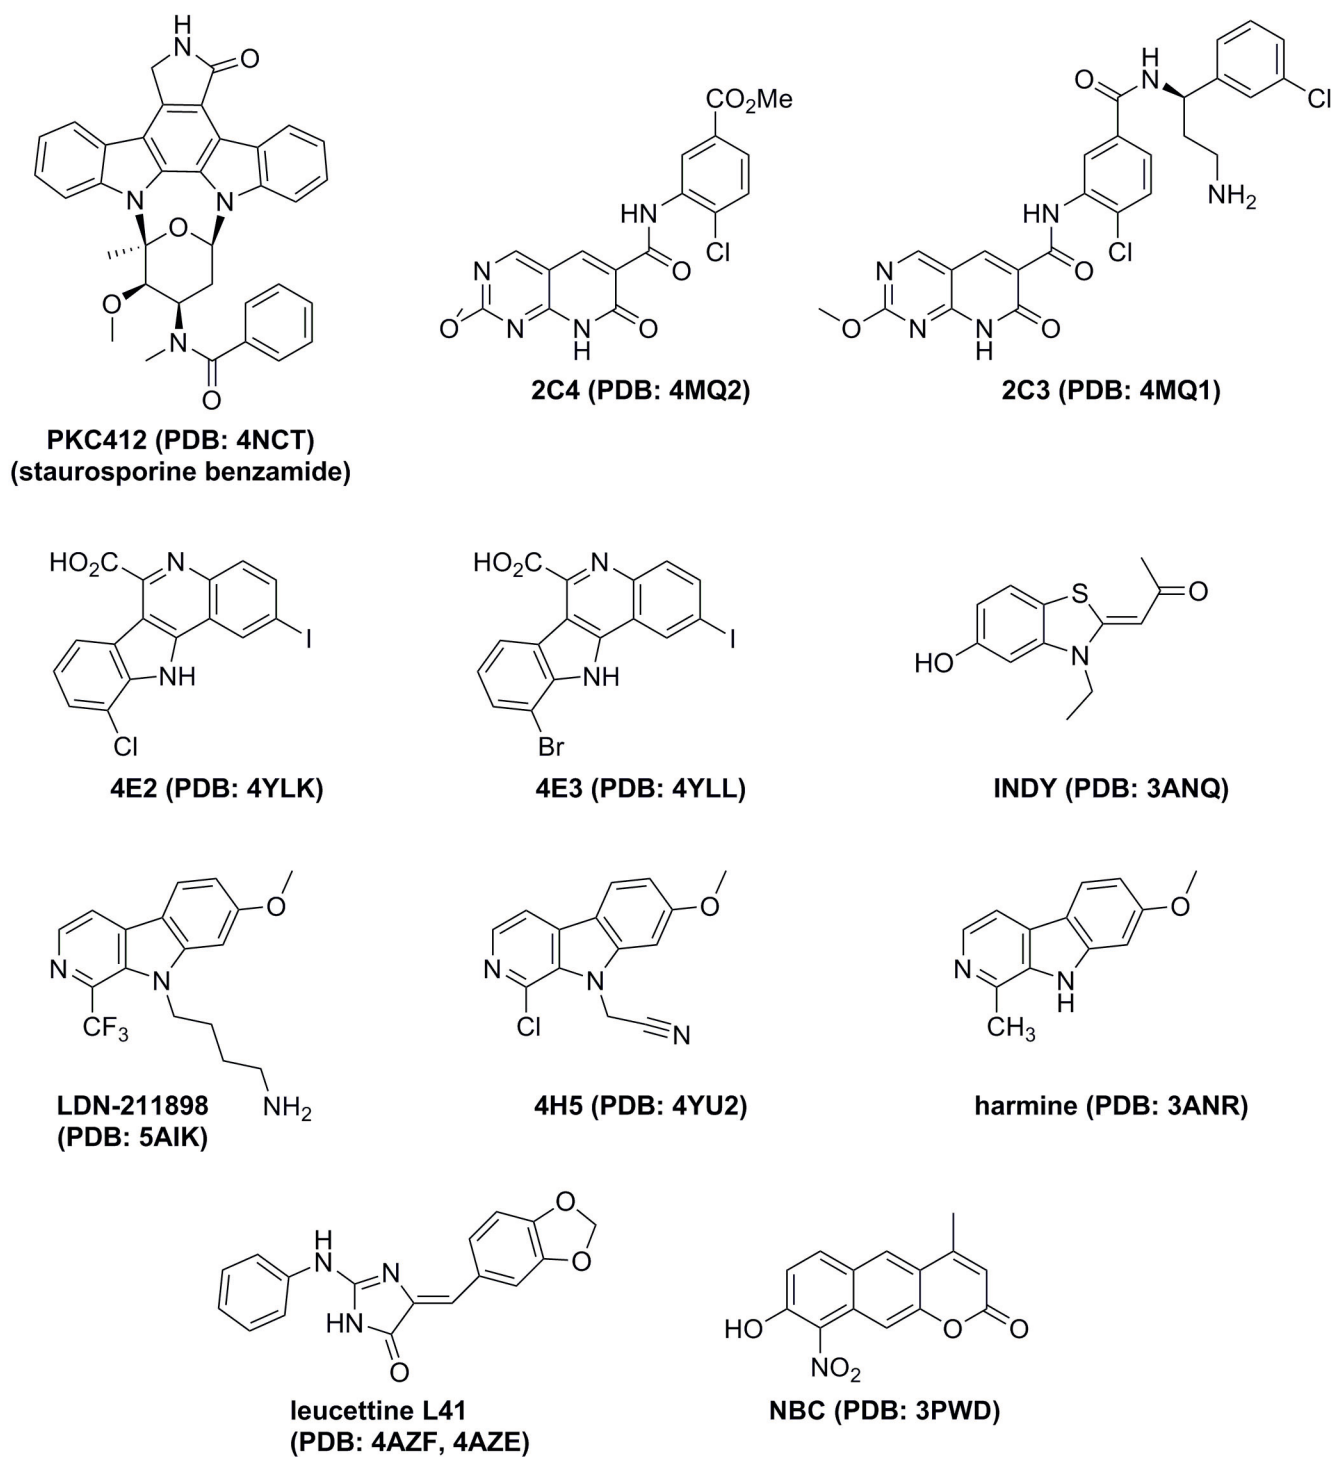

Figure 5 figure supplement 1. Summary of X-ray structures of DYRK1A and ligands bound. The information in parentheses is the PDB code for the relevant structure.
