# Supplementary material for: Inhibition of DYRK1A disrupts neural lineage specificationin human pluripotent stem cells
Source: eLife journal article supplement (doi:10.7554/elife.24502), 2017-09-04
Supplement: supp [file elife-24502-supp-v1.zip › elife_poa_e24502_Supplementary_File_1.xlsx]

## Sheet: Summary
Supplementary File 1. Activity of ID-8 against a range of 338 protein kinases.
Kinase Profiling Report for:		The University of Melbourne			Quote #	20120926-UM-Au-337PK
Compound ID-8 tested against 339 Kinases
NEK5 and SIK3 are new members as standard kinases for testing
Standard kinases NIK/MAP3K14 and TTK are currently unavailable for testing
Compounds were tested in single dose duplicate mode at a concentration of 10 uM
Control Compound was tested in 10-dose IC50 mode with 3-fold serial dilution starting at 20 μM, 40 μM (for NEK6)
Reactions were carried out at 10 μM ATP
Data pages include raw data, % Enzyme activity (relative to DMSO controls) , and curve fits.
Enzyme Activity Summary:
	% Enzyme Activity (relative to DMSO controls)
Kinases	ID-8	ID-8	IC50 (M) Staurosporine*	IC50 (M) Alternate Control cpd*.	Alternate compound ID
	Data 1	Data 2
ABL1	94.4716	83.8457	2.821e-08
ABL2/ARG	81.8925	83.6461	1.044e-08
ACK1	97.6908	95.1146	5.136e-08
AKT1	94.9553	96.0618	3.78e-09
AKT2	92.9392	98.8473	1.207e-08
AKT3	99.0031	90.4855	1.822e-09
ALK	89.1052	89.9598	1.784e-09
ALK1/ACVRL1	104.265	101.271	8.911e-07
ALK2/ACVR1	103.105	106.929	6.193e-07
ALK3/BMPR1A	113.08	118.818	2.938e-06
ALK4/ACVR1B	113.151	114.488	2.871e-06
ALK5/TGFBR1	106.387	104.362	9.519e-06
ALK6/BMPR1B	110.401	110.599	ND	2.054e-07	Dorsomorphin
ARAF	106.13	103.308	ND	1.529e-08	GW5074
ARK5/NUAK1	92.1723	104.804	< 1.00E-9
ASK1/MAP3K5	109.168	112.352	1.014e-08
Aurora A	92.3237	90.2032	< 1.00E-9
Aurora B	94.5732	90.9051	2.216e-09
Aurora C	94.8499	103.297	1.568e-09
AXL	91.3462	98.1005	3.499e-09
BLK	59.1211	59.8913	< 1.00E-9
BMPR2	70.3189	70.7515	9.97e-08
BMX/ETK	89.7516	95.5128	4.449e-09
BRAF	93.4789	94.1803	ND	8.16e-08	GW5074
BRK	94.871	92.6964	8.16e-08
BRSK1	87.4519	84.5793	< 1.00E-9
BRSK2	92.5635	90.4223	< 1.00E-9
BTK	83.8956	81.5917	8.667e-09
CAMK1a	91.9499	85.4554	2.966e-09
CAMK1b	95.8086	96.2285	3.198e-09
CAMK1d	90.2307	86.9608	< 1.00E-9
CAMK1g	103.175	98.4074	2.785e-09
CAMK2a	94.2702	92.8696	< 1.00E-9
CAMK2b	95.1158	94.6701	< 1.00E-9
CAMK2d	91.6277	96.1373	< 1.00E-9
CAMK2g	93.5001	91.6957	< 1.00E-9
CAMK4	83.6685	90.2229	7.132e-08
CAMKK1	90.3574	85.1243	1.942e-08
CAMKK2	101.439	98.5266	1.712e-08
CDC7/DBF4	77.7847	80.0237	2.361e-08
CDK1/cyclin A	83.6654	92.8672	4.303e-09
CDK1/cyclin B	84.7346	88.504	1.751e-09
CDK1/cyclin E	90.281	86.3175	2.019e-09
CDK2/cyclin A	85.1227	87.2163	< 1.00E-9
CDK2/Cyclin A1	77.879	84.4714	1.125e-09
CDK2/cyclin E	82.7265	86.3043	< 1.00E-9
CDK3/cyclin E	92.0171	90.1709	8.868e-09
CDK4/cyclin D1	96.1952	93.8687	1.142e-08
CDK4/cyclin D3	86.5776	91.4604	1.954e-08
CDK5/p25	83.7499	86.6037	2.073e-09
CDK5/p35	88.4522	87.3713	1.379e-09
CDK6/cyclin D1	81.2859	80.9079	2.955e-09
CDK6/cyclin D3	96.115	89.6608	3.881e-08
CDK7/cyclin H	96.8596	98.5272	6.621e-08
CDK9/cyclin K	87.2289	93.4347	1.298e-08
CDK9/cyclin T1	83.9022	88.9967	5.792e-09
CHK1	97.5945	100.993	< 1.00E-9
CHK2	94.1213	101.576	2.769e-09
CK1a1	86.4383	88.9471	4.379e-06
CK1d	89.6464	89.7872	ND	1.83e-07	D4476
CK1epsilon	75.9376	83.7874	ND	8.315e-08	D4476
CK1g1	80.7912	79.0255	8.213e-06
CK1g2	75.7594	77.611	1.035e-06
CK1g3	82.2696	79.6636	1.665e-06
CK2a	88.8435	91.4556	ND	5.821e-07	GW5074
CK2a2	84.896	83.6862	7.204e-07
c-Kit	97.3279	106.173	7.141e-08
CLK1	51.3263	47.156	3.952e-09
CLK2	82.9304	83.749	1.669e-09
CLK3	92.7113	87.1377	1.571e-06
CLK4	47.0117	44.6513	2.072e-08
c-MER	95.2913	95.5326	7.688e-09
c-MET	95.7625	97.433	1.239e-07
COT1/MAP3K8	99.921	91.7258	ND	9.736e-06	Ro-31-8220
CSK	96.9688	103.135	9.608e-09
c-Src	93.1689	83.9272	1.61e-09
CTK/MATK	94.4726	95.5677	2.298e-07
DAPK1	80.5144	82.7495	8.198e-09
DAPK2	97.7791	105.983	4.79e-09
DCAMKL1	94.1473	92.9878	2.831e-07
DCAMKL2	99.292	105.476	2.203e-08
DDR1	92.1071	98.4871	2.099e-09
DDR2	100.104	102.543	1.789e-08
DLK/MAP3K12	85.3421	90.5719	2.594e-08
DMPK	95.7021	94.7108	4.328e-08
DMPK2	91.2021	90.5024	< 1.00E-9
DRAK1/STK17A	102.031	104.621	1.122e-08
DYRK1/DYRK1A	16.6188	17.6067	1.922e-09
DYRK1B	10.2859	11.0263	< 1.00E-9
DYRK2	117.598	118.598	1.106e-07
DYRK3	83.5459	87.3844	3.718e-08
DYRK4	87.3746	86.0808	ND	2.798e-06	GW5074
EGFR	97.6891	98.0158	1.848e-07
EPHA1	91.0152	95.7513	1.979e-07
EPHA2	96.5388	91.8248	3.975e-08
EPHA3	97.4777	101.902	2.559e-08
EPHA4	99.6031	96.9109	4.218e-08
EPHA5	96.6338	92.2792	4.127e-08
EPHA6	83.4377	83.7454	9.764e-09
EPHA7	90.5523	87.6141	2.753e-08
EPHA8	99.437	97.7915	9.521e-08
EPHB1	98.5393	100.551	2.794e-08
EPHB2	96.1042	96.3019	1.648e-07
EPHB3	91.112	94.2804	1.238e-06
EPHB4	87.4781	92.6745	1.206e-07
ERBB2/HER2	95.6907	90.2358	9.282e-08
ERBB4/HER4	96.0426	102.087	3.167e-07
ERK1	92.3219	97.1986	5.58e-06
ERK2/MAPK1	108.971	102.464	5.93e-06
ERK5/MAPK7	91.1734	91.6657	3.535e-05
ERK7/MAPK15	79.5261	83.2406	7.122e-09
FAK/PTK2	88.2106	92.2845	8.849e-09
FER	103.35	98.8736	< 1.00E-9
FES/FPS	97.0118	98.3772	1.483e-09
FGFR1	85.9635	87.9204	3.568e-09
FGFR2	76.8804	80.3098	2.096e-09
FGFR3	58.799	66.9607	6.17e-09
FGFR4	86.4646	86.729	1.406e-07
FGR	92.1142	94.0244	< 1.00E-9
FLT1/VEGFR1	93.5589	95.6521	1e-08
FLT3	70.8027	75.7366	< 1.00E-9
FLT4/VEGFR3	89.1836	91.7704	1.695e-09
FMS	90.6969	98.1042	2.053e-09
FRK/PTK5	88.8107	90.4391	1.877e-08
FYN	91.9031	91.9508	1.482e-09
GCK/MAP4K2	65.1318	60.8092	< 1.00E-9
GRK1	101.619	100.956	6.03e-08
GRK2	97.5829	96.2612	1.266e-06
GRK3	97.0128	95.6519	7.742e-07
GRK4	91.6862	99.3173	7.904e-08
GRK5	104.859	99.5487	4.308e-08
GRK6	98.9456	96.8135	2.983e-08
GRK7	103.283	99.7461	2.583e-09
GSK3a	33.5218	36.6558	4.622e-09
GSK3b	16.9538	14.8281	2.598e-09
Haspin	86.6412	87.2862	3.368e-08
HCK	78.6472	78.9957	< 1.00E-9
HGK/MAP4K4	67.0534	73.7314	< 1.00E-9
HIPK1	106.127	93.8932	ND	1.976e-07	Ro-31-8220
HIPK2	100.155	106.78	5.861e-07
HIPK3	92.6712	85.394	1.09e-06
HIPK4	95.2199	97.8505	4.105e-07
HPK1/MAP4K1	91.357	87.4734	ND	3.88e-08	Ro-31-8220
IGF1R	87.224	87.4103	3.25e-08
IKKa/CHUK	91.9471	93.2974	2.051e-07
IKKb/IKBKB	81.067	86.2867	2.132e-07
IKKe/IKBKE	92.8436	93.3263	< 1.00E-9
IR	99.1531	96.7517	2.727e-08
IRAK1	94.3496	93.2441	2.884e-08
IRAK4	83.0959	79.7663	3.022e-09
IRR/INSRR	97.0352	98.0331	8.917e-09
ITK	113.828	113.932	7.566e-09
JAK1	96.462	100.987	< 1.00E-9
JAK2	94.5427	94.0953	< 1.00E-9
JAK3	89.3473	85.4726	< 1.00E-9
JNK1	98.474	103.245	2.194e-06
JNK2	101.667	96.994	3.861e-06
JNK3	107.81	100.899	ND	1.459e-07	JNKi VIII
KDR/VEGFR2	88.9731	83.0053	1.592e-08
KHS/MAP4K5	109.823	104.144	< 1.00E-9
LATS1	95.325	97.0823	2.184e-09
LATS2	76.1967	80.3317	1.713e-09
LCK	81.4148	87.4291	1.797e-09
LCK2/ICK	99.8036	96.1582	4.408e-07
LIMK1	98.3366	104.603	< 1.00E-9
LKB1	92.7472	92.4702	1.087e-07
LOK/STK10	97.35	91.725	8.248e-09
LRRK2	23.8263	26.5413	5.04e-09
LYN	96.5469	100.072	< 1.00E-9
LYN B	93.8983	91.2672	3.456e-09
MAPKAPK2	87.6167	85.8669	1.127e-07
MAPKAPK3	96.2605	97.2858	3.539e-06
MAPKAPK5/PRAK	87.4603	81.2692	8.237e-07
MARK1	95.3231	91.5205	< 1.00E-9
MARK2/PAR-1Ba	98.7964	102.932	< 1.00E-9
MARK3	90.1002	96.9456	< 1.00E-9
MARK4	95.0926	97.1662	< 1.00E-9
MEK1	85.2034	82.9295	1.933e-08
MEK2	83.6938	84.1567	1.756e-08
MEK3	110.412	102.11	1.131e-08
MEKK1	93.2046	93.3783	8.774e-07
MEKK2	91.9124	99.648	5.816e-09
MEKK3	83.5341	87.7638	8.959e-09
MELK	93.336	87.5399	< 1.00E-9
MINK/MINK1	65.8373	71.8715	< 1.00E-9
MKK4	97.6064	95.7355	2.534e-06
MKK6	92.9756	95.2319	4.752e-09
MLCK/MYLK	90.0624	89.9054	2.264e-08
MLCK2/MYLK2	95.5997	93.4572	1.088e-08
MLK1/MAP3K9	100.544	92.1709	< 1.00E-9
MLK2/MAP3K10	96.6369	98.9945	2.326e-09
MLK3/MAP3K11	82.8382	91.9281	4.225e-09
MNK1	85.6481	82.3428	5.259e-08
MNK2	93.2279	98.178	2.951e-08
MRCKa/CDC42BPA	94.9146	85.4473	3.309e-09
MRCKb/CDC42BPB	88.9663	91.1384	3.622e-09
MSK1/RPS6KA5	97.3739	94.0928	< 1.00E-9
MSK2/RPS6KA4	98.0733	91.4226	< 1.00E-9
MSSK1/STK23	89.9237	92.4755	1.919e-06
MST1/STK4	93.6277	94.8417	< 1.00E-9
MST2/STK3	101.405	89.415	1.852e-09
MST3/STK24	102.37	105.815	2.795e-09
MST4	95.0846	90.7374	1.309e-09
MUSK	77.6584	71.7915	1.234e-07
MYLK3	96.4517	95.0233	2.544e-07
MYO3b	69.531	69.9611	9.121e-09
NEK1	110.771	118.77	7.897e-09
NEK11	95.6629	94.6527	1.636e-07
NEK2	108.295	111.017	3.938e-07
NEK3	105.602	112.862	2.846e-05
NEK4	100.326	98.6144	1.388e-07
NEK5	95.7894	100.275	6.066e-08
NEK6	103.767	108.919	ND	9.85e-06	PKR Inhibitor
NEK7	94.9015	94.5206	ND	7.3e-06	PKR Inhibitor
NEK9	94.5045	97.5246	9.37e-08
NLK	88.9194	88.2913	4.541e-08
OSR1/OXSR1	76.5442	76.5928	4.462e-08
P38a/MAPK14	104.144	103.05	ND	4.349e-09	SB202190
P38b/MAPK11	101.911	101.66	ND	1.881e-08	SB202190
P38d/MAPK13	105.635	115.949	5.359e-08
P38g	86.0174	89.5083	2.393e-07
p70S6K/RPS6KB1	95.2871	96.2821	< 1.00E-9
p70S6Kb/RPS6KB2	89.7328	91.6859	1.811e-09
PAK1	287.504	281.475	< 1.00E-9
PAK2	117.254	116.298	1.598e-09
PAK3	188.625	212.168	< 1.00E-9
PAK4	92.6806	93.3066	3.032e-08
PAK5	96.3739	95.8132	5.329e-09
PAK6	88.1867	91.0129	4.203e-08
PASK	67.6371	73.1903	5.587e-09
PBK/TOPK	79.886	80.3315	8.182e-08
PDGFRa	94.7489	96.0297	1.078e-09
PDGFRb	88.3408	90.6203	1.367e-09
PDK1/PDPK1	84.7904	89.6858	< 1.00E-9
PHKg1	98.4984	96.0723	1.122e-09
PHKg2	92.9522	89.5446	< 1.00E-9
PIM1	31.3272	29.4398	1.877e-09
PIM2	86.1062	81.9016	2.749e-08
PIM3	31.1613	33.8571	< 1.00E-9
PKA	89.6838	89.9792	< 1.00E-9
PKAcb	100.466	97.1731	< 1.00E-9
PKAcg	105.906	100.411	2.274e-09
PKCa	97.7331	98.6611	< 1.00E-9
PKCb1	89.2291	97.3468	2.41e-09
PKCb2	97.5535	98.1478	< 1.00E-9
PKCd	86.8048	87.0224	< 1.00E-9
PKCepsilon	97.6719	100.166	< 1.00E-9
PKCeta	90.3879	99.5954	1.114e-09
PKCg	97.9341	103.206	1.736e-09
PKCiota	96.8437	97.8485	1.332e-08
PKCmu/PRKD1	95.1353	98.7634	1.01e-09
PKCnu/PRKD3	99.8667	99.9418	< 1.00E-9
PKCtheta	76.0435	80.7567	1.515e-09
PKCzeta	96.3071	97.8201	7.839e-08
PKD2/PRKD2	98.5927	93.895	< 1.00E-9
PKG1a	114.065	115.545	< 1.00E-9
PKG1b	106.925	104.94	< 1.00E-9
PKG2/PRKG2	87.0273	97.419	< 1.00E-9
PKN1/PRK1	86.1033	97.0165	< 1.00E-9
PKN2/PRK2	94.8464	99.8022	< 1.00E-9
PKN3/PRK3	90.4341	98.168	5.861e-09
PLK1	98.0563	100.277	9.963e-08
PLK2	100.112	98.9285	1.51e-06
PLK3	92.7337	100.059	1.15e-07
PLK4/SAK	93.8529	83.5835	1.539e-08
PRKX	109.207	103.739	< 1.00E-9
PYK2	102.52	99.7949	6.191e-09
RAF1	94.7073	92.6933	ND	1.086e-08	GW5074
RET	92.5633	92.0035	2.089e-09
RIPK2	84.6747	83.8097	4.027e-07
RIPK3	114.633	104.975	ND	6.053e-07	GW5074
RIPK5	103.21	95.3182	3.621e-08
ROCK1	94.2493	97.546	< 1.00E-9
ROCK2	100.882	98.5919	< 1.00E-9
RON/MST1R	86.2389	86.3422	1.834e-07
ROS/ROS1	92.8003	95.428	< 1.00E-9
RSK1	69.1522	56.507	< 1.00E-9
RSK2	76.2729	80.86	< 1.00E-9
RSK3	69.4735	68.6485	< 1.00E-9
RSK4	70.5821	70.7481	< 1.00E-9
SGK1	88.6347	90.9666	4.114e-09
SGK2	92.8177	94.1232	6.631e-09
SGK3/SGKL	88.4866	90.9068	5.437e-08
SIK1	97.7799	98.3903	< 1.00E-9
SIK2	85.3987	81.2763	< 1.00E-9
SIK3	92.0141	91.9898	< 1.00E-9
SLK/STK2	113.912	105.458	1.008e-08
SNARK/NUAK2	95.8327	97.8191	1.564e-08
SRMS	99.4199	99.9706	8.255e-06
SRPK1	77.8574	86.4979	1.796e-08
SRPK2	96.9777	98.4168	1.664e-07
SSTK/TSSK6	99.4904	86.1407	1.453e-07
STK16	88.3365	96.381	2.84e-07
STK22D/TSSK1	85.2855	85.1166	< 1.00E-9
STK25/YSK1	100.261	105.643	1.255e-09
STK32B/YANK2	88.6831	84.3764	1.411e-07
STK32C/YANK3	87.4214	90.6423	2.913e-07
STK33	83.8387	83.2917	2.319e-08
STK38/NDR1	91.234	94.1607	2.132e-08
STK38L/NDR2	86.9238	83.1398	< 1.00E-9
STK39/STLK3	89.0946	90.6305	1.432e-08
SYK	95.0574	101.003	< 1.00E-9
TAK1	89.3736	87.6272	2.413e-08
TAOK1	105.328	94.9698	< 1.00E-9
TAOK2/TAO1	89.8536	86.184	1.938e-09
TAOK3/JIK	84.622	88.6572	< 1.00E-9
TBK1	101.465	107.889	< 1.00E-9
TEC	95.6612	94.1278	7.956e-08
TESK1	84.5111	87.7398	1.743e-07
TGFBR2	107.562	97.9155	1.203e-05
TIE2/TEK	93.3374	92.6132	7.481e-08
TLK1	99.6628	99.0814	1.164e-08
TLK2	97.2331	98.1675	1.769e-09
TNIK	76.5544	76.1195	< 1.00E-9
TNK1	98.5549	99.421	1.232e-09
TRKA	118.041	119.162	1.091e-09
TRKB	87.7434	89.927	< 1.00E-9
TRKC	86.931	90.9019	< 1.00E-9
TSSK2	90.7803	83.8647	4.225e-09
TSSK3/STK22C	84.3379	87.4591	2.105e-08
TTBK1	96.8109	102.255	3.844e-05
TTBK2	101.663	98.6913	4.786e-05
TXK	90.5384	94.2817	9.893e-09
TYK1/LTK	82.8838	84.8995	6.687e-09
TYK2	95.5352	100.173	< 1.00E-9
TYRO3/SKY	95.7308	101.185	3.871e-09
ULK1	98.5551	98.6876	4.446e-09
ULK2	101.454	100.451	1.28e-09
ULK3	92.0624	95.3428	1.876e-09
VRK1	82.1795	87.6248	ND	8.632e-06	Ro-31-8220
VRK2	104.649	101.834	ND	5.227e-05	Ro-31-8220
WEE1	80.0746	85.0395	ND	3.514e-08	WEE1 Inhibitor
WNK1	99.5969	101.858	1.472e-05
WNK2	98.2259	94.7531	1.619e-06
WNK3	112.676	109.474	ND	1.486e-06	Wee1 inhibitor
YES/YES1	70.0467	73.5715	< 1.00E-9
ZAK/MLTK	89.5272	96.8531	ND	9.259e-07	GW5074
ZAP70	86.9529	86.6479	3.958e-09
ZIPK/DAPK3	92.6403	90.9679	4.382e-09
ND	Indicates compound not tested against enzyme

## Sheet: ABL1
Kinase Profiling Report for:			ABL1
Raw data
	Compound ID	Data 1	Data 2			Staurosporine	Stauro Conc.(M)
	ID-8	444938	394892			-1734.42	2e-05
	DMSO	483524				2466.35	6.66667e-06
						9809.68	2.22222e-06
						22662.4	7.40741e-07
						62904.8	2.46914e-07
						134322	8.23045e-08
						235021	2.74348e-08
						342733	9.14495e-09
						470264	3.04832e-09
						458658	1.01611e-09
						468648	DMSO
%Activity
	Compound ID	Data 1	Data 2			Staurosporine	Stauro Conc.(M)
	ID-8	94.4716	83.8457			-0.368261	2e-05
	DMSO	102.664				0.523669	6.66667e-06
						2.08284	2.22222e-06
						4.81179	7.40741e-07
						13.3563	2.46914e-07
						28.52	8.23045e-08
						49.9009	2.74348e-08
						72.771	9.14495e-09
						99.8489	3.04832e-09
						97.3847	1.01611e-09
						99.506	DMSO
					HILLSLOPE	-0.9555
					IC50 (M)	2.821e-08

## Sheet: ABL2-ARG
Kinase Profiling Report for:			ABL2/ARG
Raw data
	Compound ID	Data 1	Data 2			Staurosporine	Stauro Conc.(M)
	ID-8	297174	303538			1358.07	2e-05
	DMSO	343039				3721.25	6.66667e-06
						7108.81	2.22222e-06
						9864.02	7.40741e-07
						18438.6	2.46914e-07
						41373.9	8.23045e-08
						88548.8	2.74348e-08
						173738	9.14495e-09
						250029	3.04832e-09
						284015	1.01611e-09
						325289	DMSO
%Activity
	Compound ID	Data 1	Data 2			Staurosporine	Stauro Conc.(M)
	ID-8	81.8925	83.6461			0.423814	2e-05
	DMSO	94.5316				1.16129	6.66667e-06
						2.21845	2.22222e-06
						3.07827	7.40741e-07
						5.75413	2.46914e-07
						12.9116	8.23045e-08
						27.6334	2.74348e-08
						54.2184	9.14495e-09
						78.0265	3.04832e-09
						88.6324	1.01611e-09
						101.513	DMSO
					HILLSLOPE	-0.9292
					IC50 (M)	1.044e-08

## Sheet: ACK1
Kinase Profiling Report for:			ACK1
Raw data
	Compound ID	Data 1	Data 2			Staurosporine	Stauro Conc.(M)
	ID-8	305930	297862			8697.04	2e-05
	DMSO	316042				2339.41	6.66667e-06
						3020.86	2.22222e-06
						4626.92	7.40741e-07
						7514.4	2.46914e-07
						94025	8.23045e-08
						235673	2.74348e-08
						280930	9.14495e-09
						296240	3.04832e-09
						302518	1.01611e-09
						329258	DMSO
%Activity
	Compound ID	Data 1	Data 2			Staurosporine	Stauro Conc.(M)
	ID-8	97.6908	95.1146			2.77717	2e-05
	DMSO	100.92				0.747029	6.66667e-06
						0.964633	2.22222e-06
						1.47749	7.40741e-07
						2.39953	2.46914e-07
						30.0244	8.23045e-08
						75.2561	2.74348e-08
						89.7078	9.14495e-09
						94.5965	3.04832e-09
						96.6011	1.01611e-09
						105.14	DMSO
					HILLSLOPE	-1.788
					IC50 (M)	5.136e-08

## Sheet: AKT1
Kinase Profiling Report for:			AKT1
Raw data
	Compound ID	Data 1	Data 2			Staurosporine	Stauro Conc.(M)
	ID-8	640086	647546			306.726	2e-05
	DMSO	641410				5004.99	6.66667e-06
						11730.8	2.22222e-06
						15930.9	7.40741e-07
						25993.6	2.46914e-07
						45961.3	8.23045e-08
						115992	2.74348e-08
						220490	9.14495e-09
						340854	3.04832e-09
						497114	1.01611e-09
						651480	DMSO
%Activity
	Compound ID	Data 1	Data 2			Staurosporine	Stauro Conc.(M)
	ID-8	94.9553	96.0618			0.0455021	2e-05
	DMSO	95.1516				0.742478	6.66667e-06
						1.74023	2.22222e-06
						2.36331	7.40741e-07
						3.85608	2.46914e-07
						6.81824	8.23045e-08
						17.2071	2.74348e-08
						32.7092	9.14495e-09
						50.5649	3.04832e-09
						73.7456	1.01611e-09
						96.6455	DMSO
					HILLSLOPE	-0.7993
					IC50 (M)	3.78e-09

## Sheet: AKT2
Kinase Profiling Report for:			AKT2
Raw data
	Compound ID	Data 1	Data 2			Staurosporine	Stauro Conc.(M)
	ID-8	476006	506265			14366.2	2e-05
	DMSO	503429				11082.4	6.66667e-06
						14429	2.22222e-06
						18142.2	7.40741e-07
						38796.2	2.46914e-07
						78961.5	8.23045e-08
						159033	2.74348e-08
						278328	9.14495e-09
						377354	3.04832e-09
						458473	1.01611e-09
						490208	DMSO
%Activity
	Compound ID	Data 1	Data 2			Staurosporine	Stauro Conc.(M)
	ID-8	92.9392	98.8473			2.80498	2e-05
	DMSO	98.2935				2.16382	6.66667e-06
						2.81723	2.22222e-06
						3.54224	7.40741e-07
						7.57488	2.46914e-07
						15.4171	8.23045e-08
						31.0509	2.74348e-08
						54.343	9.14495e-09
						73.6776	3.04832e-09
						89.516	1.01611e-09
						95.7122	DMSO
					HILLSLOPE	-0.8714
					IC50 (M)	1.207e-08

## Sheet: AKT3
Kinase Profiling Report for:			AKT3
Raw data
	Compound ID	Data 1	Data 2			Staurosporine	Stauro Conc.(M)
	ID-8	788905	721033			3159.12	2e-05
	DMSO	790028				6166.59	6.66667e-06
						6966.7	2.22222e-06
						11420.1	7.40741e-07
						20252.9	2.46914e-07
						44200.5	8.23045e-08
						85542.9	2.74348e-08
						191717	9.14495e-09
						328666	3.04832e-09
						534976	1.01611e-09
						853800	DMSO
%Activity
	Compound ID	Data 1	Data 2			Staurosporine	Stauro Conc.(M)
	ID-8	99.0031	90.4855			0.396452	2e-05
	DMSO	99.144				0.773872	6.66667e-06
						0.874281	2.22222e-06
						1.43316	7.40741e-07
						2.54162	2.46914e-07
						5.54692	8.23045e-08
						10.7352	2.74348e-08
						24.0594	9.14495e-09
						41.2457	3.04832e-09
						67.1365	1.01611e-09
						107.147	DMSO
					HILLSLOPE	-0.7989
					IC50 (M)	1.822e-09

## Sheet: ALK
Kinase Profiling Report for:			ALK
Raw data
	Compound ID	Data 1	Data 2			Staurosporine	Stauro Conc.(M)
	ID-8	1.00776e+06	1.01743e+06			-157.423	2e-05
	DMSO	1.16654e+06				4733.75	6.66667e-06
						9354.49	2.22222e-06
						13402.1	7.40741e-07
						18832.1	2.46914e-07
						23549.1	8.23045e-08
						57281.5	2.74348e-08
						134252	9.14495e-09
						358496	3.04832e-09
						775788	1.01611e-09
						1.12973e+06	DMSO
%Activity
	Compound ID	Data 1	Data 2			Staurosporine	Stauro Conc.(M)
	ID-8	89.1052	89.9598			-0.0139192	2e-05
	DMSO	103.145				0.418554	6.66667e-06
						0.827115	2.22222e-06
						1.185	7.40741e-07
						1.66511	2.46914e-07
						2.08219	8.23045e-08
						5.06478	2.74348e-08
						11.8705	9.14495e-09
						31.6979	3.04832e-09
						68.5944	1.01611e-09
						99.8897	DMSO
					HILLSLOPE	-1.282
					IC50 (M)	1.784e-09

## Sheet: ALK1-ACVRL1
Kinase Profiling Report for:			ALK1/ACVRL1
Raw data
	Compound ID	Data 1	Data 2			Staurosporine	Stauro Conc.(M)
	ID-8	856404	831813			107008	2e-05
	DMSO	808024				179932	6.66667e-06
						274965	2.22222e-06
						462902	7.40741e-07
						635247	2.46914e-07
						721578	8.23045e-08
						789350	2.74348e-08
						809006	9.14495e-09
						875509	3.04832e-09
						858607	1.01611e-09
						863511	DMSO
%Activity
	Compound ID	Data 1	Data 2			Staurosporine	Stauro Conc.(M)
	ID-8	104.265	101.271			13.0279	2e-05
	DMSO	98.3746				21.9062	6.66667e-06
						33.4761	2.22222e-06
						56.3569	7.40741e-07
						77.3395	2.46914e-07
						87.85	8.23045e-08
						96.101	2.74348e-08
						98.494	9.14495e-09
						106.591	3.04832e-09
						104.533	1.01611e-09
						105.13	DMSO
					HILLSLOPE	-0.6894
					IC50 (M)	8.911e-07

## Sheet: ALK2-ACVR1
Kinase Profiling Report for:			ALK2/ACVR1
Raw data
	Compound ID	Data 1	Data 2			Staurosporine	Stauro Conc.(M)
	ID-8	564311	585241			25978	2e-05
	DMSO	532573				52091.5	6.66667e-06
						110097	2.22222e-06
						234117	7.40741e-07
						387672	2.46914e-07
						482869	8.23045e-08
						543298	2.74348e-08
						531936	9.14495e-09
						514816	3.04832e-09
						526364	1.01611e-09
						536619	DMSO
%Activity
	Compound ID	Data 1	Data 2			Staurosporine	Stauro Conc.(M)
	ID-8	103.105	106.929			4.74644	2e-05
	DMSO	97.3062				9.51762	6.66667e-06
						20.1158	2.22222e-06
						42.7755	7.40741e-07
						70.8314	2.46914e-07
						88.2249	8.23045e-08
						99.2658	2.74348e-08
						97.1898	9.14495e-09
						94.062	3.04832e-09
						96.1719	1.01611e-09
						98.0455	DMSO
					HILLSLOPE	-1.063
					IC50 (M)	6.193e-07

[truncated: 330 more sheets: ALK3-BMPR1A, ALK4-ACVR1B, ALK5-TGFBR1, ALK6-BMPR1B, ARAF, ARK5-NUAK1, ASK1-MAP3K5, Aurora A, Aurora B, Aurora C, AXL, BLK, BMPR2, BMX-ETK, BRAF, BRK, BRSK1, BRSK2, BTK, c-Kit …]
