# Supplementary figures and images for: Inhibition of DYRK1A disrupts neural lineage specificationin human pluripotent stem cells
Source: eLife journal article supplement (doi:10.7554/elife.24502), 2017-09-04

Figure 4 figure supplement 1

A

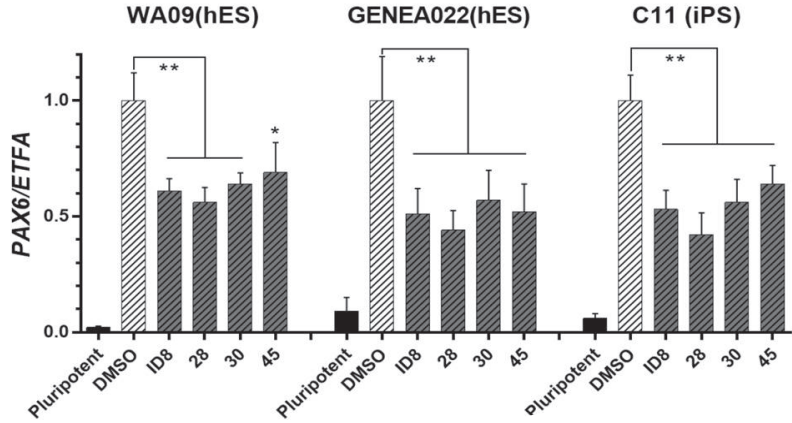

B

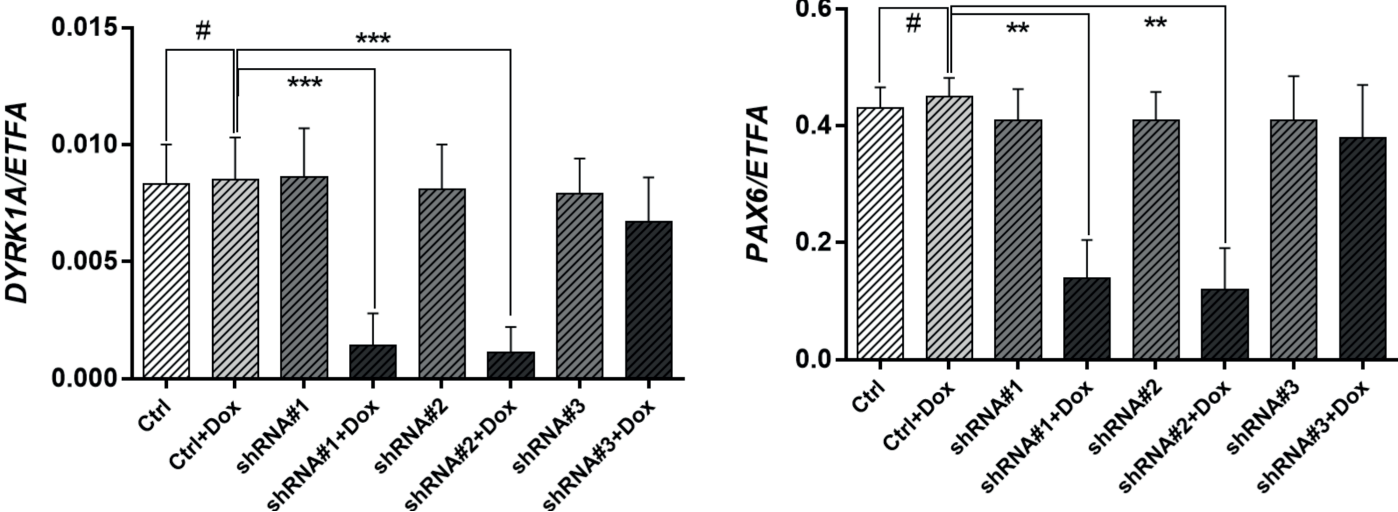

C

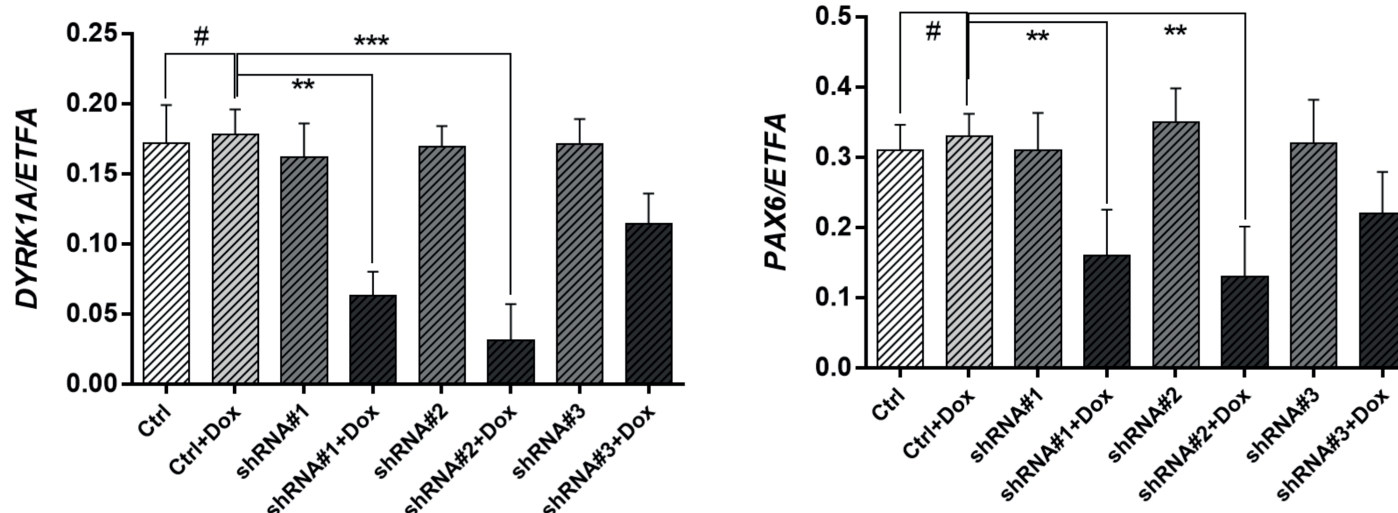

D

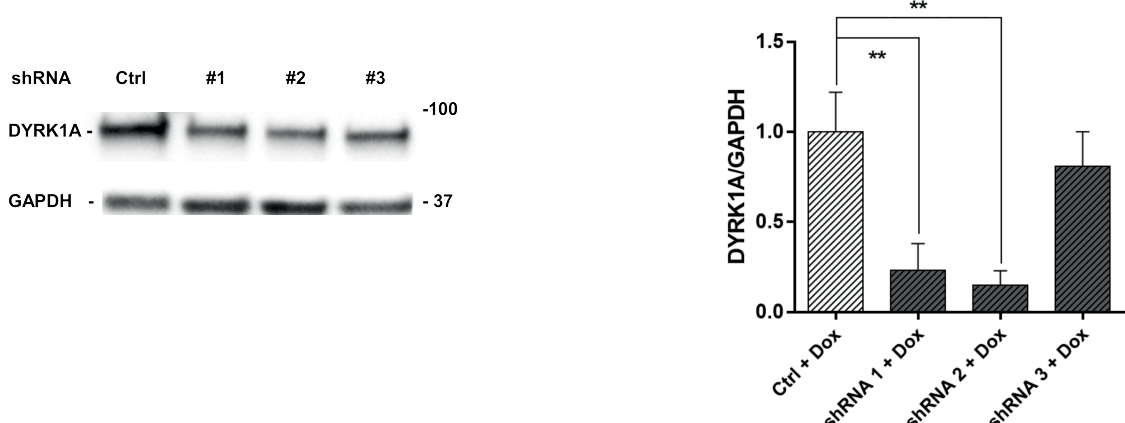

Supplement: supp [file elife-24502-supp-v1.zip › elife_poa_e24502_Figure_4_figure_supplement_1.pdf]
